# Supplementary material for: The origin of the regiospecificity of acrolein dimerization
Source: Royal Society of Chemistry journal article supplement (doi:10.1039/d0ra10084f), 2021-01-01
Supplement: d0ra10084f1.pdf [file d0ra10084f1.pdf]

## Electronic Supplementary Information

### The origin of the regioselectivity of acrolein dimerization

Ramiro F. Quijano-Quiñones <sup>\*,1</sup>, Jareth Guadarrama<sup>1</sup>, Mariana Quesadas-Rojas<sup>2,3</sup>, Gonzalo J. Mena-Rejón<sup>4</sup>, Carolina S. Castro<sup>1</sup>, David Cáceres-Castillo<sup>4</sup>

<sup>1</sup>Laboratorio de Química Teórica, Facultad de Química, Universidad Autónoma de Yucatán, Mérida, Yucatán, México; <sup>2</sup>Posgrado en Ciencias del Mar y Limnología, UNAM; <sup>3</sup>Escuela Nacional de Educación Superior, Mérida, UNAM; <sup>4</sup>Laboratorio de Química Farmacéutica, Facultad de Química, Universidad Autónoma de Yucatán, Mérida, Yucatán, México

[\\*ramiro.quijano@correo.uady.mx](mailto:ramiro.quijano@correo.uady.mx)

#### List of contents:

- Table S1. Page S2
- Cartesian coordinates of all the stationary points at levels of theory included in this study. Pages S3-S45

**Table S1.** MP2 relative activation energy (include ZPE) for acrolein dimerization in the 2CN reaction channel. The energies are in kcal/mol.

|     | TS1 | INT | TS2 |
|-----|-----|-----|-----|
| 2CN | 9.8 | 6.6 | 7.1 |

## I. B3LYP

### Acrolein

#### Cis

|   |           |           |           |
|---|-----------|-----------|-----------|
| C | 1.478700  | -0.466700 | 0.000000  |
| H | 2.559000  | -0.360400 | 0.000000  |
| H | 1.066000  | -1.471800 | 0.000000  |
| C | 0.665600  | 0.598800  | 0.000000  |
| H | 1.061700  | 1.612300  | 0.000000  |
| C | -0.813000 | 0.464200  | -0.000000 |
| H | -1.376600 | 1.420200  | -0.000000 |
| O | -1.412200 | -0.597300 | -0.000000 |

Electronic Energy + ZPE = -191.865170

#### Trans

|   |           |           |           |
|---|-----------|-----------|-----------|
| C | 1.766500  | 0.140700  | 0.000000  |
| H | 1.861300  | 1.224800  | 0.000100  |
| H | 2.689000  | -0.431200 | 0.000100  |
| C | 0.562300  | -0.448200 | 0.000000  |
| H | 0.443200  | -1.529000 | -0.000000 |
| C | -0.676000 | 0.352100  | -0.000000 |
| H | -0.526800 | 1.454000  | 0.000000  |
| O | -1.797900 | -0.123200 | -0.000000 |

Electronic Energy + ZPE = -191.868560

### Transition States

#### 2CN

|   |          |           |           |
|---|----------|-----------|-----------|
| C | 1.353000 | 0.281100  | 0.752100  |
| H | 1.548800 | 0.234700  | 1.818300  |
| C | 1.422100 | -0.912500 | -0.034000 |
| H | 1.765500 | -1.843200 | 0.444500  |
| C | 0.899600 | 1.467300  | 0.120300  |

|   |           |           |           |
|---|-----------|-----------|-----------|
| H | 1.198100  | 1.546700  | -0.923300 |
| H | 1.029800  | 2.386800  | 0.688400  |
| O | 1.001000  | -0.917400 | -1.207400 |
| C | -1.353000 | 0.281000  | -0.752100 |
| C | -0.899700 | 1.467300  | -0.120300 |
| H | -1.029900 | 2.386800  | -0.688400 |
| H | -1.198200 | 1.546700  | 0.923300  |
| H | -1.548900 | 0.234600  | -1.818300 |
| C | -1.422100 | -0.912600 | 0.034000  |
| H | -1.765400 | -1.843300 | -0.444500 |
| O | -1.000900 | -0.917500 | 1.207400  |

Electronic Energy + ZPE = -383.697671

#### 2CX

|   |           |           |           |
|---|-----------|-----------|-----------|
| C | 0.924900  | 1.212100  | -0.611300 |
| H | 1.115700  | 2.274800  | -0.746900 |
| H | 0.210900  | 0.794500  | -1.319100 |
| C | 2.024900  | 0.402000  | -0.260000 |
| H | 2.972900  | 0.837400  | 0.045000  |
| C | 1.783600  | -0.967400 | -0.016700 |
| H | 2.587600  | -1.585600 | 0.415300  |
| O | 0.635400  | -1.467100 | -0.160900 |
| C | -0.324600 | 1.222700  | 0.827800  |
| H | 0.246400  | 1.634600  | 1.654600  |
| H | -0.987900 | 1.930300  | 0.333500  |
| C | -0.848100 | -0.070800 | 0.979500  |
| H | -0.564000 | -0.713200 | 1.804700  |
| C | -1.884700 | -0.564300 | 0.062400  |
| H | -2.250400 | -1.590500 | 0.246500  |
| O | -2.308700 | 0.093700  | -0.879600 |

Electronic Energy + ZPE = -383.694849

## 2TN

|   |           |           |           |
|---|-----------|-----------|-----------|
| C | 1.928800  | 0.802700  | -0.222400 |
| H | 2.593900  | 1.609500  | 0.076600  |
| H | 1.728600  | 0.751300  | -1.288300 |
| C | 2.020300  | -0.420300 | 0.462700  |
| H | 2.614400  | -0.519100 | 1.367200  |
| C | 1.081600  | -1.422000 | 0.133500  |
| H | 1.034800  | -2.340700 | 0.739400  |
| O | 0.207300  | -1.223200 | -0.754100 |
| C | 0.161700  | 1.580700  | 0.168000  |
| H | 0.388500  | 2.507100  | -0.354500 |
| H | 0.191100  | 1.665400  | 1.252300  |
| C | -0.832500 | 0.769300  | -0.392700 |
| H | -1.078700 | 0.838100  | -1.447500 |
| C | -1.779800 | 0.015500  | 0.442800  |
| H | -1.420300 | -0.215500 | 1.469500  |
| O | -2.898800 | -0.308300 | 0.083400  |

Electronic Energy + ZPE = -383.692219

## 2TX

|   |           |           |           |
|---|-----------|-----------|-----------|
| C | 2.227400  | -0.128500 | 0.019300  |
| H | 3.152000  | -0.003300 | 0.576300  |
| C | 1.472600  | -1.310000 | 0.174800  |
| H | 1.877500  | -2.138000 | 0.778100  |
| C | 1.590800  | 0.959500  | -0.607700 |
| H | 0.992100  | 0.719700  | -1.481400 |
| H | 2.135700  | 1.898300  | -0.679300 |
| O | 0.285700  | -1.379900 | -0.248200 |
| C | -0.829400 | 0.408600  | 0.613700  |
| H | -0.859100 | -0.171400 | 1.528800  |

|   |           |           |           |
|---|-----------|-----------|-----------|
| C | -1.944000 | 0.193500  | -0.320300 |
| H | -1.841800 | 0.702100  | -1.303600 |
| C | 0.054100  | 1.489200  | 0.449000  |
| H | -0.269300 | 2.272700  | -0.236100 |
| H | 0.550000  | 1.864900  | 1.339100  |
| O | -2.931500 | -0.472600 | -0.063600 |

Electronic Energy + ZPE = -383.691202

### 3CN

|   |           |           |           |
|---|-----------|-----------|-----------|
| C | -0.572200 | -1.117300 | 1.117600  |
| H | -0.023200 | -1.934900 | 1.577600  |
| H | -1.026100 | -0.411900 | 1.802800  |
| C | -1.133500 | -1.273300 | -0.146500 |
| H | -0.986900 | -2.177500 | -0.728700 |
| C | -1.646200 | -0.128900 | -0.772100 |
| H | -2.023800 | -0.182000 | -1.801200 |
| O | -1.571900 | 1.020700  | -0.218200 |
| C | 0.217600  | 1.526200  | 0.334900  |
| H | -0.167200 | 2.282100  | 1.008200  |
| H | 0.438800  | 1.852300  | -0.674100 |
| C | 0.951300  | 0.442000  | 0.856900  |
| H | 1.180500  | 0.426500  | 1.919600  |
| C | 1.867400  | -0.285400 | -0.028900 |
| H | 2.631200  | -0.910700 | 0.480100  |
| O | 1.805700  | -0.261200 | -1.251300 |

Electronic Energy + ZPE = -383.692367

### 3CX

|   |           |          |           |
|---|-----------|----------|-----------|
| C | -0.340800 | 1.355200 | -0.278000 |
| H | 0.154400  | 2.287300 | -0.017600 |
| H | 0.040800  | 0.851500 | -1.158800 |

|   |           |           |           |
|---|-----------|-----------|-----------|
| C | -1.669600 | 1.150200  | 0.089400  |
| H | -2.219100 | 1.876900  | 0.680800  |
| C | -2.203600 | -0.131800 | -0.106500 |
| H | -3.228600 | -0.358800 | 0.218900  |
| O | -1.487500 | -1.091400 | -0.544300 |
| C | 0.217400  | -1.342000 | 0.430700  |
| H | -0.320300 | -1.956700 | 1.140900  |
| H | 0.666900  | -1.859800 | -0.408600 |
| C | 0.791500  | -0.126700 | 0.845000  |
| H | 0.578000  | 0.237600  | 1.846300  |
| C | 2.091800  | 0.286900  | 0.281300  |
| H | 2.672900  | 0.983600  | 0.922200  |
| O | 2.529300  | -0.060200 | -0.805100 |

Electronic Energy + ZPE = -383.690738

3TN

|   |           |           |           |
|---|-----------|-----------|-----------|
| C | -0.262100 | -1.111800 | 0.926000  |
| H | 0.539600  | -1.800600 | 1.177500  |
| H | -0.679400 | -0.553500 | 1.756300  |
| C | -1.107500 | -1.383500 | -0.156800 |
| H | -0.951700 | -2.246100 | -0.798200 |
| C | -1.981100 | -0.366600 | -0.557300 |
| H | -2.605800 | -0.493000 | -1.452600 |
| O | -1.968500 | 0.775600  | 0.015100  |
| C | -0.138100 | 1.580700  | 0.092700  |
| H | -0.497300 | 2.318100  | 0.798900  |
| H | -0.222300 | 1.861500  | -0.951600 |
| C | 0.833200  | 0.643200  | 0.487300  |
| H | 1.239300  | 0.710200  | 1.494000  |
| C | 1.765400  | 0.106600  | -0.522900 |
| H | 1.394700  | 0.150400  | -1.571400 |

O 2.859000 -0.370300 -0.273400

Electronic Energy + ZPE = -383.691412

3TX

C -0.224000 1.267500 -0.393600

H 0.482700 2.072200 -0.211600

H -0.138000 0.772300 -1.354600

C -1.488600 1.294700 0.202700

H -1.770900 2.077700 0.900700

C -2.273500 0.139800 0.097200

H -3.243000 0.079400 0.611200

O -1.824500 -0.910400 -0.473000

C -0.040000 -1.473400 0.255600

H -0.560800 -1.972600 1.062000

H 0.147700 -2.083500 -0.622200

C 0.787400 -0.367000 0.514900

H 0.833600 0.038400 1.521500

C 2.031300 -0.229200 -0.269400

H 2.023200 -0.751300 -1.252400

O 3.008200 0.406900 0.085700

Electronic Energy + ZPE = -383.691423

## Products

2CN

C -2.20037100 0.00509400 0.07127100

H -3.28498200 -0.01008600 0.11010400

C -1.55755700 -1.16442300 -0.03983900

H -2.05373700 -2.12541400 -0.12070300

C -1.46904800 1.32437500 0.09571400

H -1.50506100 1.77141300 1.09944600

H -1.96419700 2.04041200 -0.57183500



|   |             |             |             |
|---|-------------|-------------|-------------|
| O | -0.19403400 | -1.31281500 | -0.07438300 |
| C | 0.55348200  | -0.14680900 | 0.29615600  |
| C | -0.01219800 | 1.12551100  | -0.35121600 |
| H | 0.62243100  | 1.97281900  | -0.07710800 |
| H | 0.03342800  | 1.01253200  | -1.44105900 |
| H | 0.51552300  | -0.04302100 | 1.39243000  |
| C | 1.99516000  | -0.41744100 | -0.09845000 |
| H | 2.17009800  | -1.38706900 | -0.60922700 |
| O | 2.89524500  | 0.36413700  | 0.12140100  |

Electronic Energy + ZPE = -383.757018

### 2CX

|   |             |             |             |
|---|-------------|-------------|-------------|
| C | 0.85126700  | 1.45924800  | -0.18640100 |
| H | 1.47850600  | 2.29723000  | 0.14174400  |
| H | 0.22388600  | 1.85313200  | -0.99798000 |
| C | 1.71773300  | 0.32914400  | -0.68062200 |
| H | 2.55524200  | 0.54224000  | -1.33768900 |
| C | 1.51886700  | -0.94393500 | -0.31306500 |
| H | 2.16041000  | -1.76673400 | -0.60927200 |
| O | 0.49636800  | -1.38722100 | 0.49012600  |
| C | -0.02319100 | 0.97869000  | 0.98321400  |
| H | 0.56506600  | 0.94554800  | 1.90636800  |
| H | -0.87459000 | 1.64465400  | 1.14869400  |
| C | -0.55255200 | -0.43539600 | 0.71149400  |
| H | -1.09624400 | -0.81257900 | 1.58665000  |
| C | -1.52884000 | -0.49200000 | -0.46547200 |
| H | -1.36554600 | -1.33498400 | -1.16963500 |
| O | -2.43967200 | 0.29434500  | -0.61059800 |

Electronic Energy + ZPE = -383.756095

### 3TN

|   |             |             |             |
|---|-------------|-------------|-------------|
| C | 0.59514800  | 1.43914700  | 0.44633500  |
| H | 0.22752200  | 2.35695600  | -0.03334200 |
| H | 1.01251300  | 1.75533500  | 1.41170600  |
| C | 1.64481300  | 0.78742000  | -0.41809900 |
| H | 2.39749400  | 1.40011300  | -0.90359400 |
| C | 1.66268500  | -0.53464900 | -0.64590100 |
| H | 2.37161300  | -1.01907000 | -1.30908300 |
| O | 0.79858900  | -1.44256500 | -0.10601200 |
| C | -0.03040900 | -0.94856600 | 0.95539000  |
| H | 0.56237900  | -0.93114100 | 1.87916200  |
| H | -0.84364600 | -1.66848400 | 1.05696100  |
| C | -0.57165100 | 0.46286200  | 0.66859100  |
| H | -1.17185600 | 0.75929700  | 1.53968500  |
| C | -1.53856800 | 0.43852700  | -0.51312200 |
| H | -1.30056700 | 1.12200800  | -1.35725600 |
| O | -2.52703300 | -0.26286700 | -0.54941400 |

Electronic Energy + ZPE = -383.753914

### 3TX

|   |             |             |             |
|---|-------------|-------------|-------------|
| C | 0.18602600  | 1.35149700  | 0.13442400  |
| H | -0.13898500 | 2.17329700  | -0.51541400 |
| H | -0.06143600 | 1.65966600  | 1.16189900  |
| C | 1.66867400  | 1.12605000  | -0.01520800 |
| H | 2.33505200  | 1.98171000  | -0.05049000 |
| C | 2.19428500  | -0.09661800 | -0.16390600 |
| H | 3.24743700  | -0.28515100 | -0.34183400 |
| O | 1.48378500  | -1.26451100 | -0.13220000 |
| C | 0.14729900  | -1.15130300 | 0.36436600  |
| H | -0.34562500 | -2.08766900 | 0.09518700  |
| H | 0.18745900  | -1.06937900 | 1.46042500  |
| C | -0.58813100 | 0.06622200  | -0.23470100 |

|   |             |             |             |
|---|-------------|-------------|-------------|
| H | -0.63231200 | -0.05684400 | -1.32178200 |
| C | -2.00705300 | 0.10844000  | 0.28654100  |
| H | -2.10802700 | 0.37149900  | 1.36481500  |
| O | -2.99505500 | -0.12459700 | -0.37803700 |

Electronic Energy + ZPE = -383.753987

## II. M062X

### Acrolein

#### Cis

|   |           |           |           |
|---|-----------|-----------|-----------|
| C | 1.457000  | -0.470300 | 0.000000  |
| H | 2.538500  | -0.386700 | 0.000000  |
| H | 1.016300  | -1.463600 | 0.000000  |
| C | 0.668400  | 0.606100  | 0.000000  |
| H | 1.073300  | 1.614700  | 0.000000  |
| C | -0.812700 | 0.466200  | -0.000000 |
| H | -1.389800 | 1.411300  | 0.000000  |
| O | -1.389300 | -0.598400 | -0.000000 |

Electronic Energy + ZPE = -191.768233

#### Trans

|   |           |           |           |
|---|-----------|-----------|-----------|
| C | 1.756200  | 0.144300  | 0.000000  |
| H | 1.833500  | 1.229700  | 0.000100  |
| H | 2.684600  | -0.416500 | 0.000100  |
| C | 0.563700  | -0.454500 | 0.000000  |
| H | 0.445300  | -1.534600 | -0.000000 |
| C | -0.675300 | 0.351200  | -0.000000 |
| H | -0.523300 | 1.451300  | 0.000000  |
| O | -1.788500 | -0.122000 | -0.000000 |

Electronic Energy + ZPE = -191.771122

## Transition States

2CN

|   |           |           |           |
|---|-----------|-----------|-----------|
| C | -1.475000 | -0.402800 | -0.721400 |
| H | -1.684300 | -0.595500 | -1.768000 |
| C | -0.828500 | -1.378600 | 0.067500  |
| H | -0.617000 | -2.371100 | -0.352300 |
| C | -1.593500 | 0.877500  | -0.153700 |
| H | -1.813400 | 0.890800  | 0.910500  |
| H | -2.099000 | 1.644000  | -0.735700 |
| O | -0.367700 | -1.059300 | 1.189500  |
| C | 0.941000  | 0.770400  | 0.756400  |
| C | 0.113100  | 1.639400  | 0.032800  |
| H | -0.192500 | 2.554500  | 0.533100  |
| H | 0.364000  | 1.744100  | -1.019200 |
| H | 1.072800  | 0.851500  | 1.829000  |
| C | 1.720700  | -0.212900 | 0.012200  |
| H | 2.439000  | -0.830700 | 0.575600  |
| O | 1.525600  | -0.396400 | -1.181400 |

Electronic Energy + ZPE = -383.509886

2CX

|   |           |           |           |
|---|-----------|-----------|-----------|
| C | 0.915100  | 1.194700  | -0.614700 |
| H | 1.096300  | 2.258900  | -0.743700 |
| H | 0.162900  | 0.774700  | -1.281500 |
| C | 2.003000  | 0.379800  | -0.273500 |
| H | 2.963600  | 0.794900  | 0.013600  |
| C | 1.716800  | -0.974500 | -0.026800 |
| H | 2.487700  | -1.626800 | 0.408900  |
| O | 0.549000  | -1.418700 | -0.168500 |
| C | -0.307500 | 1.190900  | 0.880900  |
| H | 0.287100  | 1.589500  | 1.695800  |

|   |           |           |           |
|---|-----------|-----------|-----------|
| H | -0.966000 | 1.900500  | 0.384100  |
| C | -0.803100 | -0.106400 | 0.989000  |
| H | -0.549700 | -0.764300 | 1.811500  |
| C | -1.836200 | -0.554100 | 0.031600  |
| H | -2.206500 | -1.586300 | 0.149700  |
| O | -2.224600 | 0.153200  | -0.876300 |

Electronic Energy + ZPE = -383.506007

2TN

|   |           |           |           |
|---|-----------|-----------|-----------|
| C | -1.962300 | 0.731300  | 0.187500  |
| H | -2.641000 | 1.516100  | -0.135300 |
| H | -1.756100 | 0.699500  | 1.252600  |
| C | -1.959700 | -0.485500 | -0.495200 |
| H | -2.511700 | -0.628000 | -1.418300 |
| C | -0.973300 | -1.412700 | -0.107500 |
| H | -0.820100 | -2.331000 | -0.692200 |
| O | -0.167400 | -1.130000 | 0.815500  |
| C | -0.187300 | 1.582100  | -0.169300 |
| H | -0.461700 | 2.493900  | 0.353100  |
| H | -0.221000 | 1.648000  | -1.253900 |
| C | 0.783900  | 0.773700  | 0.410100  |
| H | 1.051800  | 0.872100  | 1.457100  |
| C | 1.722700  | 0.009800  | -0.438500 |
| H | 1.311900  | -0.281600 | -1.430900 |
| O | 2.855400  | -0.267600 | -0.122400 |

Electronic Energy + ZPE = -383.502768

2TX

|   |          |           |          |
|---|----------|-----------|----------|
| C | 2.212000 | -0.173400 | 0.009600 |
| H | 3.146700 | -0.079000 | 0.552200 |
| C | 1.399800 | -1.308900 | 0.182900 |

|   |           |           |           |
|---|-----------|-----------|-----------|
| H | 1.749500  | -2.148700 | 0.799900  |
| C | 1.611900  | 0.912600  | -0.631900 |
| H | 0.959300  | 0.680100  | -1.467800 |
| H | 2.161700  | 1.846200  | -0.716800 |
| O | 0.214800  | -1.310300 | -0.239100 |
| C | -0.787300 | 0.396100  | 0.630100  |
| H | -0.846200 | -0.170800 | 1.552400  |
| C | -1.893700 | 0.193100  | -0.328800 |
| H | -1.741900 | 0.666900  | -1.322400 |
| C | 0.069600  | 1.483900  | 0.477700  |
| H | -0.233700 | 2.255000  | -0.228900 |
| H | 0.598000  | 1.850900  | 1.350600  |
| O | -2.898200 | -0.429900 | -0.080600 |

Electronic Energy + ZPE = -383.501508

3CN

|   |           |           |           |
|---|-----------|-----------|-----------|
| C | -0.645000 | -1.033900 | 1.198500  |
| H | -0.159700 | -1.827000 | 1.761100  |
| H | -1.081800 | -0.228600 | 1.777000  |
| C | -1.101800 | -1.254100 | -0.083900 |
| H | -0.932300 | -2.188100 | -0.607500 |
| C | -1.512500 | -0.116800 | -0.803700 |
| H | -1.772900 | -0.197100 | -1.865800 |
| O | -1.468600 | 1.033100  | -0.276600 |
| C | 0.294700  | 1.542400  | 0.326600  |
| H | -0.093200 | 2.313200  | 0.981900  |
| H | 0.531300  | 1.842500  | -0.687800 |
| C | 0.987600  | 0.455900  | 0.865900  |
| H | 1.226100  | 0.423400  | 1.924400  |
| C | 1.774700  | -0.358400 | -0.060000 |
| H | 2.530200  | -1.035600 | 0.384900  |

O 1.589400 -0.347300 -1.264400

Electronic Energy + ZPE = -383.506378

3CX

C -0.324400 1.335100 -0.274500

H 0.198400 2.256300 -0.027200

H 0.048000 0.790200 -1.136600

C -1.641200 1.154000 0.108300

H -2.176200 1.874800 0.717000

C -2.176200 -0.130100 -0.104400

H -3.189400 -0.372000 0.245600

O -1.464500 -1.056900 -0.579700

C 0.224900 -1.348100 0.445800

H -0.346400 -1.963000 1.129500

H 0.679700 -1.851600 -0.400900

C 0.787300 -0.147500 0.873300

H 0.570300 0.223700 1.870300

C 2.069600 0.281400 0.277800

H 2.683500 0.955000 0.909000

O 2.451000 -0.040900 -0.828200

Electronic Energy + ZPE = -383.503214

3TN

C -0.238500 -1.069700 0.966300

H 0.590700 -1.703300 1.269200

H -0.705300 -0.476400 1.744700

C -1.013600 -1.397100 -0.139500

H -0.790100 -2.250800 -0.770300

C -1.919100 -0.414100 -0.567700

H -2.497400 -0.555500 -1.490700

O -1.971600 0.706100 0.017500

|   |           |           |           |
|---|-----------|-----------|-----------|
| C | -0.173200 | 1.598300  | 0.055800  |
| H | -0.568300 | 2.345100  | 0.732700  |
| H | -0.276300 | 1.823700  | -1.001000 |
| C | 0.816000  | 0.714600  | 0.480200  |
| H | 1.221100  | 0.801800  | 1.484900  |
| C | 1.716400  | 0.114000  | -0.522400 |
| H | 1.322400  | 0.122900  | -1.562800 |
| O | 2.793600  | -0.379000 | -0.272800 |

Electronic Energy + ZPE = -383.504135

### 3TX

|   |           |           |           |
|---|-----------|-----------|-----------|
| C | -0.205300 | 1.259300  | -0.377300 |
| H | 0.526500  | 2.040400  | -0.190700 |
| H | -0.120200 | 0.733300  | -1.323000 |
| C | -1.458100 | 1.299400  | 0.217600  |
| H | -1.732800 | 2.067600  | 0.932400  |
| C | -2.245700 | 0.145100  | 0.079700  |
| H | -3.210100 | 0.065900  | 0.599400  |
| O | -1.792700 | -0.871600 | -0.519300 |
| C | -0.054000 | -1.482300 | 0.283900  |
| H | -0.619100 | -1.959100 | 1.074200  |
| H | 0.138100  | -2.096900 | -0.590600 |
| C | 0.780300  | -0.400100 | 0.552400  |
| H | 0.826100  | 0.026400  | 1.549500  |
| C | 2.000000  | -0.245000 | -0.264600 |
| H | 1.983300  | -0.793500 | -1.232300 |
| O | 2.955800  | 0.428900  | 0.048100  |

Electronic Energy + ZPE = -383.503550

### Products

2CN



|   |             |             |             |
|---|-------------|-------------|-------------|
| C | -2.18286500 | 0.02230700  | 0.06715300  |
| H | -3.26663100 | 0.01562100  | 0.10330500  |
| C | -1.55544500 | -1.14988500 | -0.05636800 |
| H | -2.06546100 | -2.10206100 | -0.14948700 |
| C | -1.43850200 | 1.33186300  | 0.10180200  |
| H | -1.46431800 | 1.76606900  | 1.10940000  |
| H | -1.92731800 | 2.05513000  | -0.55934300 |
| O | -0.19934800 | -1.31117700 | -0.08579700 |
| C | 0.53923800  | -0.16386700 | 0.30825700  |
| C | 0.00687600  | 1.10876000  | -0.34705300 |
| H | 0.66068200  | 1.94288100  | -0.08137400 |
| H | 0.04814600  | 0.97785500  | -1.43455600 |
| H | 0.47390200  | -0.06272200 | 1.40436500  |
| C | 1.98462200  | -0.43975900 | -0.05268900 |
| H | 2.19120000  | -1.45523100 | -0.44517000 |
| O | 2.85262900  | 0.38692000  | 0.07657800  |

Electronic Energy + ZPE = -383.584125

### 2CX

|   |             |             |             |
|---|-------------|-------------|-------------|
| C | 0.70074600  | 1.48892100  | -0.12614400 |
| H | 1.30261700  | 2.34471300  | 0.19684300  |
| H | -0.00134400 | 1.86909100  | -0.87845500 |
| C | 1.59403600  | 0.43145400  | -0.71839300 |
| H | 2.36473700  | 0.71445300  | -1.42718600 |
| C | 1.51105700  | -0.85757200 | -0.37512100 |
| H | 2.18680900  | -1.62330300 | -0.73925000 |
| O | 0.57846000  | -1.38392200 | 0.47594400  |
| C | -0.06439400 | 0.90685900  | 1.06558300  |
| H | 0.57997100  | 0.85822700  | 1.94874100  |
| H | -0.94218900 | 1.50959600  | 1.30980800  |
| C | -0.51423000 | -0.51393900 | 0.73376800  |

|   |             |             |             |
|---|-------------|-------------|-------------|
| H | -1.05369800 | -0.96352300 | 1.57537100  |
| C | -1.44902600 | -0.54315000 | -0.47269000 |
| H | -1.30160800 | -1.40059300 | -1.16108600 |
| O | -2.30401400 | 0.28590900  | -0.65929500 |

Electronic Energy + ZPE = -383.584684

### 3TN

|   |             |             |             |
|---|-------------|-------------|-------------|
| C | -0.09457800 | 1.11127900  | 0.95504100  |
| H | -0.92999100 | 1.79443700  | 0.77274800  |
| H | 0.26838800  | 1.30282600  | 1.97153800  |
| C | 0.98981600  | 1.35431000  | -0.06231800 |
| H | 1.29493900  | 2.37090400  | -0.28287100 |
| C | 1.54904900  | 0.36592700  | -0.76389600 |
| H | 2.27177300  | 0.52166200  | -1.55677400 |
| O | 1.27468600  | -0.96271500 | -0.59641700 |
| C | 0.60287500  | -1.26826000 | 0.61668000  |
| H | 1.30840100  | -1.17187600 | 1.45256300  |
| H | 0.29239500  | -2.31285400 | 0.53071200  |
| C | -0.58518300 | -0.33126200 | 0.83455900  |
| H | -1.10956600 | -0.65230100 | 1.74642800  |
| C | -1.57571700 | -0.51335600 | -0.30310500 |
| H | -1.77134700 | -1.56874300 | -0.59163100 |
| O | -2.14250800 | 0.38823000  | -0.86664200 |

Electronic Energy + ZPE = -383.582622

### 3TX

|   |             |            |             |
|---|-------------|------------|-------------|
| C | 0.19958200  | 1.35509900 | 0.12402400  |
| H | -0.10635500 | 2.17927900 | -0.52930100 |
| H | -0.04717300 | 1.66332400 | 1.15046100  |
| C | 1.67671200  | 1.10434400 | -0.01696800 |
| H | 2.36068200  | 1.94464000 | -0.04997400 |

|   |             |             |             |
|---|-------------|-------------|-------------|
| C | 2.17767600  | -0.12449700 | -0.16494700 |
| H | 3.22773100  | -0.32912700 | -0.34139200 |
| O | 1.44820800  | -1.27314900 | -0.12879900 |
| C | 0.13300900  | -1.12519300 | 0.38018600  |
| H | -0.38564400 | -2.05701100 | 0.14826300  |
| H | 0.18880300  | -1.00322300 | 1.47252400  |
| C | -0.58020600 | 0.08442100  | -0.24242000 |
| H | -0.61821900 | -0.05477300 | -1.32760900 |
| C | -1.99561700 | 0.13828300  | 0.27641400  |
| H | -2.10107400 | 0.45907500  | 1.33726700  |
| O | -2.97141900 | -0.15146700 | -0.37094900 |

Electronic Energy + ZPE = -383.580853

### III. MP2

#### Acrolein

Cis

|   |             |             |             |
|---|-------------|-------------|-------------|
| C | 1.46725100  | -0.47452600 | 0.00000200  |
| H | 2.54384000  | -0.38106900 | 0.00000600  |
| H | 1.03748000  | -1.46751300 | -0.00000400 |
| C | 0.66787500  | 0.60580200  | 0.00000400  |
| H | 1.07682700  | 1.60944100  | 0.00001000  |
| C | -0.80847700 | 0.47466800  | -0.00000200 |
| H | -1.37760300 | 1.41864300  | -0.00000700 |
| O | -1.40505500 | -0.60189500 | -0.00000300 |

Electronic Energy + ZPE = -191.291947

Trans

|   |            |             |            |
|---|------------|-------------|------------|
| C | 1.76693400 | 0.14200000  | 0.00004400 |
| H | 1.85264500 | 1.22209000  | 0.00006500 |
| H | 2.68601600 | -0.42648500 | 0.00005900 |

|   |             |             |             |
|---|-------------|-------------|-------------|
| C | 0.56114400  | -0.45325900 | 0.00000000  |
| H | 0.44633600  | -1.53021700 | -0.00002200 |
| C | -0.66848400 | 0.35445100  | -0.00001700 |
| H | -0.51708200 | 1.44940100  | -0.00001500 |
| O | -1.80318500 | -0.12174300 | -0.00003100 |

Electronic Energy + ZPE = -191.321499

### Intermediary

2CN

|   |             |             |             |
|---|-------------|-------------|-------------|
| C | -1.30886900 | 0.20386500  | -0.71013700 |
| H | -1.64404300 | 0.12661800  | -1.73662300 |
| C | -1.32655000 | -0.91487000 | 0.15209300  |
| H | -1.67555500 | -1.88812100 | -0.20707200 |
| C | -0.80439400 | 1.44159400  | -0.13311600 |
| H | -1.21945200 | 1.56858200  | 0.86622100  |
| H | -1.00804100 | 2.31087600  | -0.75505500 |
| O | -0.76754200 | -0.80805700 | 1.29195000  |
| C | 1.30968400  | 0.20092900  | 0.71000900  |
| C | 0.80792200  | 1.43979400  | 0.13305600  |
| H | 1.01354900  | 2.30861800  | 0.75498400  |
| H | 1.22321000  | 1.56585900  | -0.86630100 |
| H | 1.64494300  | 0.12295200  | 1.73641100  |
| C | 1.32457900  | -0.91786700 | -0.15219500 |
| H | 1.67143000  | -1.89189800 | 0.20694400  |
| O | 0.76500800  | -0.80996300 | -1.29167100 |

Electronic Energy + ZPE = -382.573362

### Transition States

2CN (1)

|   |             |            |             |
|---|-------------|------------|-------------|
| C | -1.37235000 | 0.27828200 | -0.74899600 |
| H | -1.53279900 | 0.21403900 | -1.81768900 |

|   |             |             |             |
|---|-------------|-------------|-------------|
| C | -1.39193600 | -0.91888600 | 0.04882500  |
| H | -1.69603800 | -1.86180500 | -0.42294200 |
| C | -1.00074700 | 1.46611400  | -0.12349500 |
| H | -1.18599600 | 1.52329700  | 0.94142600  |
| H | -1.08054500 | 2.39178100  | -0.68050800 |
| O | -0.97661900 | -0.90312700 | 1.23145000  |
| C | 1.37221900  | 0.27866000  | 0.74900000  |
| C | 1.00029100  | 1.46637600  | 0.12346700  |
| H | 1.07983000  | 2.39207600  | 0.68046200  |
| H | 1.18553800  | 1.52358800  | -0.94145300 |
| H | 1.53267000  | 0.21448700  | 1.81769600  |
| C | 1.39221500  | -0.91851500 | -0.04880500 |
| H | 1.69661100  | -1.86132700 | 0.42299000  |
| O | 0.97694200  | -0.90291300 | -1.23144300 |

Electronic Energy + ZPE = -382.568297

### 2CN (2)

|   |             |             |             |
|---|-------------|-------------|-------------|
| C | 0.91339500  | 0.77637000  | 0.72272600  |
| H | 1.23899600  | 0.96369800  | 1.73759200  |
| C | 1.65268300  | -0.08871700 | -0.13354800 |
| H | 2.49051100  | -0.67011200 | 0.26872500  |
| C | -0.11661300 | 1.58924500  | 0.07346100  |
| H | 0.22736200  | 1.88489800  | -0.91655000 |
| H | -0.38240100 | 2.46435800  | 0.66342300  |
| O | 1.19825200  | -0.31881500 | -1.29242600 |
| C | -1.29689700 | -0.57276300 | -0.67135200 |
| C | -1.50011200 | 0.79183600  | -0.19589800 |
| H | -2.10137700 | 1.39354000  | -0.87452500 |
| H | -1.96034200 | 0.75706800  | 0.79220700  |
| H | -1.57839900 | -0.90132400 | -1.66338800 |
| C | -0.62924300 | -1.42633300 | 0.20718800  |

H -0.35260500 -2.44261300 -0.07559100

O -0.16338000 -0.91460100 1.29900600

Electronic Energy + ZPE = -382.572588

2CX

C 0.896200 1.198600 -0.634300

H 1.058500 2.258200 -0.799800

H 0.142300 0.738100 -1.266300

C 1.995200 0.424000 -0.264000

H 2.931600 0.875900 0.042900

C 1.766000 -0.956300 -0.003600

H 2.561600 -1.559200 0.452000

O 0.620000 -1.462400 -0.176200

C -0.342300 1.199000 0.886200

H 0.256000 1.593500 1.697700

H -0.973800 1.917800 0.376400

C -0.871200 -0.089500 1.018800

H -0.584900 -0.746600 1.829800

C -1.856800 -0.560400 0.051400

H -2.262000 -1.570900 0.203900

O -2.201500 0.112500 -0.931700

Electronic Energy + ZPE = -382.560886

2TN

C -1.960700 0.739300 0.228700

H -2.666300 1.513800 -0.051500

H -1.721100 0.682800 1.283200

C -1.981700 -0.463900 -0.476200

H -2.541100 -0.571700 -1.398400

C -0.991700 -1.423800 -0.140100

H -0.855500 -2.312500 -0.767000

|   |           |           |           |
|---|-----------|-----------|-----------|
| O | -0.169000 | -1.184300 | 0.795900  |
| C | -0.209600 | 1.567400  | -0.187600 |
| H | -0.490600 | 2.490000  | 0.305800  |
| H | -0.251200 | 1.607500  | -1.270500 |
| C | 0.812900  | 0.811700  | 0.396100  |
| H | 1.065800  | 0.929700  | 1.442900  |
| C | 1.738900  | 0.045600  | -0.435300 |
| H | 1.354000  | -0.207500 | -1.444300 |
| O | 2.876200  | -0.289400 | -0.097600 |

Electronic Energy + ZPE = -382.556566

### 2TX

|   |           |           |           |
|---|-----------|-----------|-----------|
| C | 2.212000  | -0.134500 | -0.014400 |
| H | 3.139500  | 0.001200  | 0.529900  |
| C | 1.442700  | -1.308500 | 0.190400  |
| H | 1.828500  | -2.113200 | 0.826600  |
| C | 1.572000  | 0.931000  | -0.652700 |
| H | 0.912800  | 0.668200  | -1.471100 |
| H | 2.120600  | 1.858300  | -0.778300 |
| O | 0.249100  | -1.366500 | -0.236800 |
| C | -0.819800 | 0.407900  | 0.648700  |
| H | -0.858500 | -0.183600 | 1.554500  |
| C | -1.914400 | 0.239200  | -0.302200 |
| H | -1.809000 | 0.808600  | -1.246600 |
| C | 0.088500  | 1.466600  | 0.494400  |
| H | -0.213000 | 2.269200  | -0.171800 |
| H | 0.629400  | 1.799500  | 1.370700  |
| O | -2.903600 | -0.473300 | -0.113100 |

Electronic Energy + ZPE = -382.555360

### 3CN

|   |           |           |           |
|---|-----------|-----------|-----------|
| C | -0.535700 | -0.969900 | 1.247900  |
| H | -0.016800 | -1.720200 | 1.835100  |
| H | -1.045700 | -0.197400 | 1.807100  |
| C | -1.017400 | -1.289300 | -0.013500 |
| H | -0.796700 | -2.236400 | -0.488600 |
| C | -1.534700 | -0.232200 | -0.783200 |
| H | -1.799200 | -0.382700 | -1.832600 |
| O | -1.564100 | 0.959100  | -0.304400 |
| C | 0.231100  | 1.574800  | 0.247700  |
| H | -0.167000 | 2.362800  | 0.871600  |
| H | 0.430800  | 1.821900  | -0.785300 |
| C | 0.941600  | 0.522400  | 0.830400  |
| H | 1.209200  | 0.572000  | 1.879500  |
| C | 1.796000  | -0.284800 | -0.052100 |
| H | 2.606700  | -0.859200 | 0.427300  |
| O | 1.600800  | -0.370000 | -1.267700 |

Electronic Energy + ZPE = -382.554884

### 3CX

|   |           |           |           |
|---|-----------|-----------|-----------|
| C | -0.288200 | 1.318800  | -0.274200 |
| H | 0.230400  | 2.244600  | -0.046400 |
| H | 0.061300  | 0.781000  | -1.146400 |
| C | -1.614400 | 1.166600  | 0.104500  |
| H | -2.126000 | 1.899000  | 0.716800  |
| C | -2.188900 | -0.103200 | -0.096300 |
| H | -3.191300 | -0.326800 | 0.282500  |
| O | -1.493300 | -1.055200 | -0.595800 |
| C | 0.209200  | -1.356400 | 0.454500  |
| H | -0.372800 | -1.944500 | 1.148500  |
| H | 0.666500  | -1.882700 | -0.372500 |
| C | 0.757200  | -0.136900 | 0.851200  |



|   |          |           |           |
|---|----------|-----------|-----------|
| H | 0.542300 | 0.235900  | 1.846200  |
| C | 2.073500 | 0.259600  | 0.295000  |
| H | 2.701000 | 0.873300  | 0.964600  |
| O | 2.468200 | -0.041100 | -0.829400 |

Electronic Energy + ZPE = -382.550709

3TN

|   |           |           |           |
|---|-----------|-----------|-----------|
| C | -0.240100 | -1.048700 | 0.982800  |
| H | 0.558700  | -1.704100 | 1.311900  |
| H | -0.727800 | -0.465200 | 1.752700  |
| C | -1.006500 | -1.392800 | -0.127900 |
| H | -0.766600 | -2.248600 | -0.747000 |
| C | -1.913100 | -0.423000 | -0.589900 |
| H | -2.455500 | -0.566100 | -1.529300 |
| O | -1.990500 | 0.713000  | 0.003000  |
| C | -0.163800 | 1.599300  | 0.066700  |
| H | -0.536700 | 2.348000  | 0.750200  |
| H | -0.259600 | 1.831000  | -0.986500 |
| C | 0.796000  | 0.677200  | 0.489000  |
| H | 1.216200  | 0.769300  | 1.484400  |
| C | 1.700900  | 0.095200  | -0.525200 |
| H | 1.289400  | 0.071500  | -1.552400 |
| O | 2.820600  | -0.347800 | -0.285100 |

Electronic Energy + ZPE = -382.552639

3TX

|   |           |          |           |
|---|-----------|----------|-----------|
| C | -0.199700 | 1.236800 | -0.414500 |
| H | 0.514900  | 2.041000 | -0.279000 |
| H | -0.150900 | 0.705500 | -1.357000 |
| C | -1.441900 | 1.302100 | 0.207700  |
| H | -1.683300 | 2.083400 | 0.918000  |

|   |           |           |           |
|---|-----------|-----------|-----------|
| C | -2.254800 | 0.157400  | 0.121600  |
| H | -3.186600 | 0.090200  | 0.691300  |
| O | -1.832900 | -0.882200 | -0.499200 |
| C | -0.042000 | -1.481700 | 0.264900  |
| H | -0.580800 | -1.970500 | 1.063000  |
| H | 0.155800  | -2.084800 | -0.612700 |
| C | 0.755800  | -0.364800 | 0.518500  |
| H | 0.802000  | 0.051000  | 1.517800  |
| C | 1.997500  | -0.226700 | -0.275100 |
| H | 1.975800  | -0.730200 | -1.260100 |
| O | 2.990800  | 0.391600  | 0.096600  |

Electronic Energy + ZPE = -382.552202

### Products

2CN

|   |             |             |             |
|---|-------------|-------------|-------------|
| C | -2.18723200 | 0.02901400  | 0.09046400  |
| H | -3.26778900 | 0.01842200  | 0.14483000  |
| C | -1.56123000 | -1.15461200 | -0.03381900 |
| H | -2.07300300 | -2.10388100 | -0.11154300 |
| C | -1.44108800 | 1.33408200  | 0.09997200  |
| H | -1.43595300 | 1.77638800  | 1.10110600  |
| H | -1.93969200 | 2.05258000  | -0.55485300 |
| O | -0.19634300 | -1.32321500 | -0.08835700 |
| C | 0.54301600  | -0.15212500 | 0.29103000  |
| C | -0.01020100 | 1.09979700  | -0.38117700 |
| H | 0.64509900  | 1.94111100  | -0.15286300 |
| H | 0.00236600  | 0.94160300  | -1.46288600 |
| H | 0.48402300  | -0.03834000 | 1.38206800  |
| C | 1.98040700  | -0.42478600 | -0.09040600 |
| H | 2.16680400  | -1.38697300 | -0.59530400 |
| O | 2.88085800  | 0.37457300  | 0.13749000  |

Electronic Energy + ZPE = -382.623496

2CX

|   |             |             |             |
|---|-------------|-------------|-------------|
| C | 0.69702900  | 1.49333600  | -0.12428100 |
| H | 1.29273500  | 2.34992600  | 0.19972900  |
| H | -0.01205700 | 1.87238300  | -0.86592300 |
| C | 1.59335000  | 0.44625400  | -0.72200700 |
| H | 2.36115700  | 0.72970600  | -1.43022200 |
| C | 1.51832600  | -0.85437400 | -0.38355500 |
| H | 2.19892600  | -1.61154500 | -0.74802500 |
| O | 0.58770200  | -1.39691700 | 0.47581200  |
| C | -0.05169000 | 0.90010900  | 1.06889600  |
| H | 0.60535400  | 0.83520400  | 1.93810400  |
| H | -0.91897600 | 1.50357900  | 1.33734000  |
| C | -0.51477300 | -0.51144800 | 0.72919600  |
| H | -1.04917400 | -0.96349000 | 1.56899300  |
| C | -1.44219000 | -0.54000400 | -0.47812500 |
| H | -1.27330800 | -1.37145900 | -1.18405800 |
| O | -2.33832300 | 0.27847500  | -0.64539700 |

Electronic Energy + ZPE = -382.623864

3TN

|   |             |             |             |
|---|-------------|-------------|-------------|
| C | -0.09425300 | 1.10551500  | 0.97272700  |
| H | -0.93085600 | 1.78763800  | 0.81036300  |
| H | 0.27935700  | 1.28357300  | 1.98509400  |
| C | 0.97365800  | 1.35965300  | -0.05463000 |
| H | 1.27845600  | 2.37429000  | -0.27344500 |
| C | 1.53200400  | 0.37281900  | -0.77715300 |
| H | 2.23933700  | 0.53591500  | -1.57834400 |
| O | 1.25879200  | -0.96823700 | -0.61847200 |
| C | 0.60969100  | -1.26326400 | 0.62688100  |

|   |             |             |             |
|---|-------------|-------------|-------------|
| H | 1.33100400  | -1.14378900 | 1.44174200  |
| H | 0.31479500  | -2.30973900 | 0.55651300  |
| C | -0.58156100 | -0.33522100 | 0.84578700  |
| H | -1.10098000 | -0.65959300 | 1.75712900  |
| C | -1.56582300 | -0.52156200 | -0.29174300 |
| H | -1.78366500 | -1.57336400 | -0.55506100 |
| O | -2.11751000 | 0.39291500  | -0.89092800 |

Electronic Energy + ZPE = -382.622403

3TX

|   |             |             |             |
|---|-------------|-------------|-------------|
| C | 0.16885800  | 1.34429700  | 0.15065200  |
| H | -0.16937100 | 2.16137800  | -0.49157600 |
| H | -0.07334400 | 1.63384300  | 1.17997100  |
| C | 1.64663500  | 1.13378000  | -0.01792500 |
| H | 2.31097900  | 1.98655600  | -0.05749700 |
| C | 2.18256600  | -0.08796600 | -0.18660500 |
| H | 3.23044400  | -0.26255900 | -0.38786100 |
| O | 1.48135300  | -1.26659700 | -0.14932200 |
| C | 0.16323200  | -1.13285500 | 0.39809700  |
| H | -0.33443200 | -2.07630900 | 0.18196100  |
| H | 0.24697900  | -1.00299900 | 1.48376000  |
| C | -0.57831100 | 0.05647600  | -0.21918600 |
| H | -0.60667000 | -0.07621800 | -1.30290000 |
| C | -1.99423900 | 0.08993600  | 0.28686600  |
| H | -2.10953000 | 0.32183200  | 1.36352600  |
| O | -2.98479000 | -0.12184500 | -0.40577500 |

Electronic Energy + ZPE = -382.620638

#### IV. $\omega$ B97XD

##### Acrolein

### Cis

|   |           |           |           |
|---|-----------|-----------|-----------|
| C | 1.466600  | -0.467900 | 0.000000  |
| H | 2.547100  | -0.370300 | 0.000000  |
| H | 1.042300  | -1.468100 | -0.000000 |
| C | 0.666400  | 0.600900  | 0.000000  |
| H | 1.068000  | 1.611300  | 0.000000  |
| C | -0.812000 | 0.464400  | -0.000000 |
| H | -1.380900 | 1.415200  | 0.000000  |
| O | -1.400300 | -0.596600 | -0.000000 |

Electronic Energy + ZPE = -191.793126

### Trans

|   |           |           |           |
|---|-----------|-----------|-----------|
| C | -1.759400 | 0.142600  | -0.000000 |
| H | -1.848100 | 1.227100  | -0.000100 |
| H | -2.683300 | -0.426200 | -0.000000 |
| C | -0.563200 | -0.450200 | 0.000000  |
| H | -0.447000 | -1.530600 | 0.000100  |
| C | 0.676000  | 0.351600  | 0.000000  |
| H | 0.527600  | 1.452700  | 0.000100  |
| O | 1.791300  | -0.123400 | -0.000000 |

Electronic Energy + ZPE = -191.796008

### Transition States

#### 2CN

|   |           |           |           |
|---|-----------|-----------|-----------|
| C | -1.461500 | -0.224500 | -0.735500 |
| H | -1.660600 | -0.365000 | -1.792300 |
| C | -0.992500 | -1.309000 | 0.047100  |
| H | -0.930600 | -2.310300 | -0.401500 |
| C | -1.446600 | 1.048500  | -0.141800 |
| H | -1.692600 | 1.063100  | 0.917200  |

|   |           |           |           |
|---|-----------|-----------|-----------|
| H | -1.867200 | 1.869500  | -0.718000 |
| O | -0.533000 | -1.100800 | 1.189700  |
| C | 1.069600  | 0.695600  | 0.758600  |
| C | 0.307100  | 1.648200  | 0.069500  |
| H | 0.094800  | 2.575300  | 0.596400  |
| H | 0.558600  | 1.762100  | -0.982000 |
| H | 1.212700  | 0.737400  | 1.832000  |
| C | 1.674500  | -0.379700 | 0.002500  |
| H | 2.317000  | -1.092300 | 0.544000  |
| O | 1.416100  | -0.538400 | -1.189600 |

Electronic Energy + ZPE = -383.558199

### 2CX

|   |           |           |           |
|---|-----------|-----------|-----------|
| C | 0.918800  | 1.196200  | -0.624600 |
| H | 1.105800  | 2.258600  | -0.763100 |
| H | 0.183900  | 0.773400  | -1.308200 |
| C | 2.006400  | 0.389300  | -0.265200 |
| H | 2.957700  | 0.819300  | 0.033100  |
| C | 1.747300  | -0.970600 | -0.014000 |
| H | 2.538600  | -1.598800 | 0.422700  |
| O | 0.595300  | -1.449600 | -0.154600 |
| C | -0.324700 | 1.223500  | 0.842600  |
| H | 0.259600  | 1.641300  | 1.656100  |
| H | -0.979300 | 1.924500  | 0.328200  |
| C | -0.827400 | -0.066300 | 0.989200  |
| H | -0.549900 | -0.705100 | 1.818800  |
| C | -1.851400 | -0.561700 | 0.053300  |
| H | -2.210400 | -1.591400 | 0.219900  |
| O | -2.260300 | 0.101700  | -0.882300 |

Electronic Energy + ZPE = -383.554121

## 2TN

|   |           |           |           |
|---|-----------|-----------|-----------|
| C | -1.938600 | 0.762100  | 0.196300  |
| H | -2.607300 | 1.557000  | -0.123900 |
| H | -1.747100 | 0.721700  | 1.264100  |
| C | -1.970400 | -0.453200 | -0.490100 |
| H | -2.528900 | -0.570300 | -1.413500 |
| C | -1.017500 | -1.420600 | -0.117800 |
| H | -0.914200 | -2.340200 | -0.712700 |
| O | -0.190300 | -1.185000 | 0.797700  |
| C | -0.171300 | 1.592400  | -0.158800 |
| H | -0.431600 | 2.504300  | 0.371900  |
| H | -0.205100 | 1.673300  | -1.242700 |
| C | 0.807800  | 0.784900  | 0.407000  |
| H | 1.066800  | 0.867100  | 1.456900  |
| C | 1.733700  | 0.009900  | -0.438900 |
| H | 1.331000  | -0.260800 | -1.439500 |
| O | 2.862100  | -0.290600 | -0.116100 |

Electronic Energy + ZPE = -382.551255

## 2TX

|   |           |           |           |
|---|-----------|-----------|-----------|
| C | 2.211500  | -0.141600 | 0.010600  |
| H | 3.141500  | -0.019700 | 0.556900  |
| C | 1.440600  | -1.305800 | 0.182500  |
| H | 1.831500  | -2.133600 | 0.792300  |
| C | 1.586900  | 0.933900  | -0.627600 |
| H | 0.953900  | 0.691500  | -1.476000 |
| H | 2.128200  | 1.872900  | -0.712700 |
| O | 0.255800  | -1.357300 | -0.232200 |
| C | -0.809600 | 0.411800  | 0.628200  |
| H | -0.849900 | -0.157500 | 1.549200  |
| C | -1.906300 | 0.180700  | -0.329400 |

|   |           |           |           |
|---|-----------|-----------|-----------|
| H | -1.761100 | 0.645000  | -1.328000 |
| C | 0.052800  | 1.493200  | 0.464600  |
| H | -0.256500 | 2.265900  | -0.238500 |
| H | 0.571700  | 1.866300  | 1.341400  |
| O | -2.907700 | -0.450800 | -0.075000 |

Electronic Energy + ZPE = -383.550034

### 3CN

|   |           |           |           |
|---|-----------|-----------|-----------|
| C | -0.564700 | -1.053000 | 1.169500  |
| H | -0.015600 | -1.838400 | 1.682100  |
| H | -1.035300 | -0.312200 | 1.804800  |
| C | -1.090600 | -1.277800 | -0.091500 |
| H | -0.906400 | -2.198600 | -0.633600 |
| C | -1.600100 | -0.163800 | -0.772700 |
| H | -1.937500 | -0.259800 | -1.811700 |
| O | -1.565000 | 0.992900  | -0.255300 |
| C | 0.232200  | 1.542900  | 0.299300  |
| H | -0.166400 | 2.310900  | 0.950200  |
| H | 0.436400  | 1.833600  | -0.724200 |
| C | 0.955700  | 0.477600  | 0.845800  |
| H | 1.198000  | 0.487600  | 1.905100  |
| C | 1.833100  | -0.291000 | -0.041700 |
| H | 2.608700  | -0.907500 | 0.455800  |
| O | 1.718000  | -0.308500 | -1.254800 |

Electronic Energy + ZPE = -383.552974

### 3CX

|   |           |          |           |
|---|-----------|----------|-----------|
| C | -0.325300 | 1.331200 | -0.279700 |
| H | 0.185100  | 2.257700 | -0.027900 |
| H | 0.042700  | 0.813800 | -1.159800 |
| C | -1.649300 | 1.150300 | 0.094700  |



|   |           |           |           |
|---|-----------|-----------|-----------|
| H | -2.182000 | 1.878900  | 0.697000  |
| C | -2.193200 | -0.126100 | -0.106800 |
| H | -3.214300 | -0.348900 | 0.231800  |
| O | -1.490100 | -1.073800 | -0.560800 |
| C | 0.223700  | -1.337600 | 0.453600  |
| H | -0.342200 | -1.935300 | 1.155600  |
| H | 0.669800  | -1.862000 | -0.383700 |
| C | 0.784900  | -0.122700 | 0.851500  |
| H | 0.572800  | 0.252500  | 1.848700  |
| C | 2.081100  | 0.285400  | 0.273700  |
| H | 2.674200  | 0.979500  | 0.903200  |
| O | 2.497800  | -0.066100 | -0.812600 |

Electronic Energy + ZPE = -383.550373

3TN

|   |           |           |           |
|---|-----------|-----------|-----------|
| C | -0.243800 | -1.056600 | 0.967100  |
| H | 0.572500  | -1.709200 | 1.264400  |
| H | -0.704500 | -0.480600 | 1.762100  |
| C | -1.039000 | -1.387700 | -0.128500 |
| H | -0.825700 | -2.251400 | -0.749500 |
| C | -1.938600 | -0.409700 | -0.567200 |
| H | -2.526700 | -0.571100 | -1.480900 |
| O | -1.987100 | 0.725700  | -0.008000 |
| C | -0.147200 | 1.597100  | 0.075100  |
| H | -0.535800 | 2.329300  | 0.770500  |
| H | -0.253200 | 1.845800  | -0.975300 |
| C | 0.821500  | 0.681000  | 0.484900  |
| H | 1.237500  | 0.769600  | 1.485600  |
| C | 1.728000  | 0.103500  | -0.526700 |
| H | 1.332600  | 0.116500  | -1.566100 |
| O | 2.814400  | -0.377500 | -0.284400 |

Electronic Energy + ZPE = -383.551763

3TX

|   |           |           |           |
|---|-----------|-----------|-----------|
| C | -0.209500 | 1.248100  | -0.381300 |
| H | 0.508400  | 2.042300  | -0.196600 |
| H | -0.127900 | 0.747000  | -1.340700 |
| C | -1.468500 | 1.291900  | 0.209800  |
| H | -1.739200 | 2.068200  | 0.918100  |
| C | -2.263200 | 0.146200  | 0.085300  |
| H | -3.231600 | 0.087700  | 0.600800  |
| O | -1.824500 | -0.887500 | -0.499000 |
| C | -0.036100 | -1.474500 | 0.281500  |
| H | -0.589800 | -1.948200 | 1.081000  |
| H | 0.146200  | -2.091900 | -0.592200 |
| C | 0.782700  | -0.373400 | 0.531400  |
| H | 0.832500  | 0.042600  | 1.533100  |
| C | 2.015300  | -0.235100 | -0.270700 |
| H | 1.998000  | -0.769300 | -1.246100 |
| O | 2.984500  | 0.412800  | 0.062300  |

Electronic Energy + ZPE = -383.551070

### Products

2CN

|   |             |             |             |
|---|-------------|-------------|-------------|
| C | -2.18839500 | 0.01094600  | 0.06792600  |
| H | -3.27221100 | -0.00162400 | 0.10284000  |
| C | -1.55084900 | -1.15655000 | -0.04567200 |
| H | -2.05238600 | -2.11348800 | -0.13178200 |
| C | -1.45383000 | 1.32486900  | 0.09908600  |
| H | -1.48320100 | 1.76078300  | 1.10611500  |
| H | -1.94749400 | 2.04476900  | -0.56248700 |
| O | -0.19576300 | -1.30820000 | -0.07552900 |

|   |             |             |             |
|---|-------------|-------------|-------------|
| C | 0.54519500  | -0.15426200 | 0.29883200  |
| C | -0.00560600 | 1.11660900  | -0.35060800 |
| H | 0.63603200  | 1.95796500  | -0.07814700 |
| H | 0.03718300  | 0.99904000  | -1.43938900 |
| H | 0.50010600  | -0.04793900 | 1.39442300  |
| C | 1.98604600  | -0.42546300 | -0.08321100 |
| H | 2.17338100  | -1.41182400 | -0.55250000 |
| O | 2.87241500  | 0.37262900  | 0.10588000  |

Electronic Energy + ZPE = -383.630901

### 2CX

|   |             |             |             |
|---|-------------|-------------|-------------|
| C | 0.79729900  | 1.46705300  | -0.16959100 |
| H | 1.41568600  | 2.31195100  | 0.15158000  |
| H | 0.14140500  | 1.85026700  | -0.96147900 |
| C | 1.67239000  | 0.36087200  | -0.69354300 |
| H | 2.48824700  | 0.59567600  | -1.36857600 |
| C | 1.51113700  | -0.91461700 | -0.33051500 |
| H | 2.16475200  | -1.71863500 | -0.64856700 |
| O | 0.52185700  | -1.38136600 | 0.48735800  |
| C | -0.03477200 | 0.95354400  | 1.00925700  |
| H | 0.57509000  | 0.91367100  | 1.91701000  |
| H | -0.89495900 | 1.59841800  | 1.20405700  |
| C | -0.53643800 | -0.46076200 | 0.71739000  |
| H | -1.08316300 | -0.85904500 | 1.57954600  |
| C | -1.49391600 | -0.50443200 | -0.47048200 |
| H | -1.32166900 | -1.33823500 | -1.18147500 |
| O | -2.39430500 | 0.28586500  | -0.62075600 |

Electronic Energy + ZPE = -383.630968

### 3TN

|   |            |            |            |
|---|------------|------------|------------|
| C | 0.57289300 | 1.43550600 | 0.45520400 |
|---|------------|------------|------------|

|   |             |             |             |
|---|-------------|-------------|-------------|
| H | 0.19813800  | 2.35073000  | -0.02066000 |
| H | 0.98592300  | 1.74501200  | 1.42269700  |
| C | 1.62867000  | 0.80034400  | -0.40943000 |
| H | 2.37496700  | 1.42237200  | -0.89074500 |
| C | 1.65828300  | -0.51559900 | -0.64543400 |
| H | 2.37220200  | -0.98664100 | -1.31161600 |
| O | 0.80608700  | -1.42881100 | -0.11384700 |
| C | -0.00611400 | -0.95098800 | 0.95198900  |
| H | 0.59983700  | -0.91380800 | 1.86634200  |
| H | -0.80472900 | -1.68353000 | 1.07381800  |
| C | -0.57620000 | 0.44485900  | 0.66673500  |
| H | -1.19494800 | 0.72529100  | 1.52699700  |
| C | -1.50883400 | 0.38791400  | -0.53340500 |
| H | -1.18451000 | 0.94699400  | -1.43658500 |
| O | -2.55097100 | -0.22351900 | -0.52917800 |

Electronic Energy + ZPE = -383.628672

### 3TX

|   |             |             |             |
|---|-------------|-------------|-------------|
| C | 0.18373200  | 1.34790200  | 0.13404400  |
| H | -0.13779200 | 2.17135200  | -0.51279900 |
| H | -0.06019100 | 1.64874900  | 1.16336200  |
| C | 1.66287100  | 1.11962500  | -0.01507100 |
| H | 2.33201100  | 1.97186600  | -0.04909000 |
| C | 2.18211100  | -0.10126400 | -0.16422800 |
| H | 3.23457400  | -0.28978600 | -0.34201500 |
| O | 1.47241800  | -1.26012100 | -0.13174900 |
| C | 0.14884600  | -1.14166400 | 0.36499300  |
| H | -0.34977600 | -2.07753300 | 0.10734500  |
| H | 0.19051700  | -1.04713900 | 1.46024500  |
| C | -0.58299000 | 0.06800900  | -0.23869900 |
| H | -0.62450000 | -0.05550100 | -1.32517300 |

|   |             |             |             |
|---|-------------|-------------|-------------|
| C | -1.99715200 | 0.10687900  | 0.28496800  |
| H | -2.09516300 | 0.36557000  | 1.36348300  |
| O | -2.98169100 | -0.12544100 | -0.37592500 |

Electronic Energy + ZPE = -383.627929

## V. $\omega$ B97X

### Acrolein

#### Cis

|   |             |             |             |
|---|-------------|-------------|-------------|
| C | 1.45949300  | -0.47008100 | 0.00000600  |
| H | 2.54178900  | -0.38255900 | 0.00001800  |
| H | 1.02299500  | -1.46608700 | -0.00001100 |
| C | 0.66844300  | 0.60372500  | 0.00001500  |
| H | 1.07416300  | 1.61342800  | 0.00003400  |
| C | -0.81128300 | 0.46661500  | -0.00000200 |
| H | -1.38546600 | 1.41444400  | 0.00001000  |
| O | -1.39417500 | -0.59759800 | -0.00002000 |

Electronic Energy + ZPE = -191.805607

#### Trans

|   |             |             |             |
|---|-------------|-------------|-------------|
| C | 1.75763700  | 0.14327400  | 0.00004300  |
| H | 1.84139600  | 1.22910800  | 0.00006200  |
| H | 2.68511800  | -0.42128700 | 0.00006400  |
| C | 0.56446900  | -0.45218500 | 0.00000300  |
| H | 0.44590800  | -1.53325100 | -0.00001300 |
| C | -0.67559500 | 0.35168200  | -0.00001900 |
| H | -0.52607800 | 1.45279100  | 0.00000500  |
| O | -1.79067600 | -0.12299800 | -0.00003500 |

Electronic Energy + ZPE = -191.808272

### Transition States

#### 2CN

|   |             |             |             |
|---|-------------|-------------|-------------|
| C | -1.47201200 | -0.33024900 | -0.72537400 |
| H | -1.68196600 | -0.50105700 | -1.77693500 |
| C | -0.89709000 | -1.35526200 | 0.05833000  |
| H | -0.75200000 | -2.35552200 | -0.37439900 |
| C | -1.53887600 | 0.94607900  | -0.14690600 |
| H | -1.76404100 | 0.95998400  | 0.91705900  |
| H | -2.01302000 | 1.73701900  | -0.72507800 |
| O | -0.42989100 | -1.08581400 | 1.18972900  |
| C | 0.99369300  | 0.74935800  | 0.75401200  |
| C | 0.19301900  | 1.65083900  | 0.04647400  |
| H | -0.07776100 | 2.57231800  | 0.55776600  |
| H | 0.43844600  | 1.75851000  | -1.00761900 |
| H | 1.13252900  | 0.81619400  | 1.82780700  |
| C | 1.70386400  | -0.27746100 | 0.00908300  |
| H | 2.39715300  | -0.92966700 | 0.56591900  |
| O | 1.48302500  | -0.45888600 | -1.18450900 |

Electronic Energy + ZPE = -383.577796

### 2CX

|   |             |             |             |
|---|-------------|-------------|-------------|
| C | 0.92156500  | 1.19349100  | -0.62087200 |
| H | 1.10885500  | 2.25725000  | -0.75577900 |
| H | 0.17725600  | 0.77557300  | -1.29851900 |
| C | 2.00635400  | 0.38045500  | -0.26911400 |
| H | 2.96510500  | 0.80195000  | 0.02071300  |
| C | 1.73234500  | -0.97404200 | -0.01989400 |
| H | 2.51459200  | -1.61917300 | 0.40911800  |
| O | 0.56867400  | -1.43487500 | -0.15390800 |
| C | -0.31957400 | 1.21442100  | 0.85678700  |
| H | 0.26456300  | 1.63033700  | 1.67249700  |
| H | -0.97556400 | 1.91429900  | 0.34151500  |
| C | -0.81286200 | -0.07809800 | 0.98847400  |

|   |             |             |             |
|---|-------------|-------------|-------------|
| H | -0.54840400 | -0.72276800 | 1.81925800  |
| C | -1.84229100 | -0.55914900 | 0.04400000  |
| H | -2.20675700 | -1.59004100 | 0.19358500  |
| O | -2.24528300 | 0.12113900  | -0.88092500 |

Electronic Energy + ZPE = -383.574237

2TN

|   |             |             |             |
|---|-------------|-------------|-------------|
| C | -1.94379600 | 0.75299400  | 0.18536700  |
| H | -2.61428000 | 1.54583400  | -0.13963900 |
| H | -1.75595700 | 0.71461700  | 1.25450900  |
| C | -1.96339500 | -0.46430100 | -0.49717900 |
| H | -2.51775200 | -0.59367000 | -1.42267600 |
| C | -1.00431200 | -1.41646300 | -0.11042800 |
| H | -0.88402500 | -2.34332400 | -0.69164000 |
| O | -0.18447400 | -1.15965500 | 0.81001100  |
| C | -0.17361100 | 1.59039900  | -0.15654700 |
| H | -0.43475000 | 2.50081500  | 0.37774300  |
| H | -0.20250000 | 1.67625000  | -1.24120400 |
| C | 0.79568700  | 0.77392100  | 0.41018300  |
| H | 1.06325700  | 0.85878700  | 1.45891700  |
| C | 1.72583900  | 0.00196400  | -0.43979400 |
| H | 1.31734500  | -0.28506400 | -1.43394400 |
| O | 2.86074800  | -0.27851200 | -0.12397200 |

Electronic Energy + ZPE = -383.571027

2TX

|   |            |             |             |
|---|------------|-------------|-------------|
| C | 2.21317400 | -0.15459100 | 0.01444900  |
| H | 3.14769700 | -0.04577800 | 0.55769600  |
| C | 1.42640000 | -1.30620000 | 0.18172500  |
| H | 1.79960600 | -2.14504000 | 0.78823800  |
| C | 1.59905800 | 0.92522600  | -0.62459900 |

|   |             |             |             |
|---|-------------|-------------|-------------|
| H | 0.96171700  | 0.68632100  | -1.47160400 |
| H | 2.14320100  | 1.86375000  | -0.70870800 |
| O | 0.23865400  | -1.33509900 | -0.23550600 |
| C | -0.79744000 | 0.40440400  | 0.62469400  |
| H | -0.84843100 | -0.16101000 | 1.54903500  |
| C | -1.89972700 | 0.17744800  | -0.33361300 |
| H | -1.74993600 | 0.62978700  | -1.33742000 |
| C | 0.05575200  | 1.49115800  | 0.46547800  |
| H | -0.25278600 | 2.25902800  | -0.24422200 |
| H | 0.57217200  | 1.86930600  | 1.34263400  |
| O | -2.90822200 | -0.43753000 | -0.07005100 |

Electronic Energy + ZPE = -383.569841

### 3CN

|   |             |             |             |
|---|-------------|-------------|-------------|
| C | -0.56196400 | -1.03108100 | 1.18041500  |
| H | -0.01725400 | -1.80899900 | 1.71150700  |
| H | -1.04168700 | -0.28174300 | 1.80031500  |
| C | -1.08252700 | -1.27831700 | -0.07861900 |
| H | -0.89714100 | -2.20778100 | -0.60758000 |
| C | -1.59129000 | -0.17199600 | -0.77182200 |
| H | -1.92726800 | -0.27520900 | -1.81168000 |
| O | -1.55995300 | 0.98842300  | -0.26061300 |
| C | 0.23701600  | 1.54155000  | 0.28634000  |
| H | -0.15975300 | 2.32128400  | 0.92631500  |
| H | 0.44294000  | 1.81713700  | -0.74194200 |
| C | 0.95392900  | 0.47940100  | 0.84513300  |
| H | 1.20367800  | 0.50294900  | 1.90350400  |
| C | 1.82831400  | -0.29245300 | -0.04417500 |
| H | 2.61682000  | -0.89978300 | 0.44521700  |
| O | 1.69480300  | -0.31973300 | -1.25554900 |

Electronic Energy + ZPE = -383.573667



## 3CX

|   |             |             |             |
|---|-------------|-------------|-------------|
| C | -0.32050900 | 1.32321500  | -0.27316600 |
| H | 0.19251000  | 2.25067300  | -0.02496600 |
| H | 0.04885200  | 0.80135100  | -1.15116800 |
| C | -1.64700000 | 1.14929200  | 0.09459800  |
| H | -2.18357600 | 1.88048900  | 0.69209000  |
| C | -2.18793800 | -0.12724600 | -0.11099400 |
| H | -3.21166100 | -0.35463600 | 0.21957300  |
| O | -1.47784800 | -1.07155400 | -0.56318100 |
| C | 0.22453800  | -1.33148600 | 0.46353900  |
| H | -0.34520300 | -1.93046600 | 1.16301500  |
| H | 0.67608900  | -1.85710200 | -0.37167400 |
| C | 0.78344200  | -0.11588700 | 0.85887100  |
| H | 0.58057300  | 0.25817600  | 1.85954800  |
| C | 2.07965200  | 0.28095700  | 0.27188900  |
| H | 2.69724300  | 0.95424900  | 0.90108400  |
| O | 2.47185600  | -0.06292100 | -0.82630800 |

Electronic Energy + ZPE = -383.570920

## 3TN

|   |             |             |             |
|---|-------------|-------------|-------------|
| C | -0.24137800 | -1.04871000 | 0.96609000  |
| H | 0.57919000  | -1.69522000 | 1.26932600  |
| H | -0.71088900 | -0.47381400 | 1.75771400  |
| C | -1.03099000 | -1.38847300 | -0.13053300 |
| H | -0.81327700 | -2.25339100 | -0.75038900 |
| C | -1.93587300 | -0.41465900 | -0.56642000 |
| H | -2.52576700 | -0.57460200 | -1.48023400 |
| O | -1.98722100 | 0.71896800  | -0.00212000 |
| C | -0.15233600 | 1.59466200  | 0.06848600  |
| H | -0.54435300 | 2.33174900  | 0.75864000  |
| H | -0.25989500 | 1.83677100  | -0.98447200 |

|   |            |             |             |
|---|------------|-------------|-------------|
| C | 0.81635900 | 0.68291500  | 0.48252300  |
| H | 1.23465300 | 0.77603500  | 1.48293800  |
| C | 1.72880100 | 0.10848600  | -0.52713000 |
| H | 1.34483400 | 0.13188600  | -1.57113300 |
| O | 2.81072200 | -0.37956100 | -0.27794000 |

Electronic Energy + ZPE = -383.572241

### 3TX

|   |             |             |             |
|---|-------------|-------------|-------------|
| C | -0.20530500 | 1.24181400  | -0.37396800 |
| H | 0.51876300  | 2.03202600  | -0.18897100 |
| H | -0.12479900 | 0.73855600  | -1.33316400 |
| C | -1.46674900 | 1.29259200  | 0.21081900  |
| H | -1.74128400 | 2.06981800  | 0.91798400  |
| C | -2.26000700 | 0.14736400  | 0.07745800  |
| H | -3.23340900 | 0.08345200  | 0.58432700  |
| O | -1.81353800 | -0.88356800 | -0.50812800 |
| C | -0.04119000 | -1.47157900 | 0.29318500  |
| H | -0.60224800 | -1.93903200 | 1.09259500  |
| H | 0.14507400  | -2.09797600 | -0.57473200 |
| C | 0.77987500  | -0.37255300 | 0.53771600  |
| H | 0.83784200  | 0.04773100  | 1.53834400  |
| C | 2.01068100  | -0.24160500 | -0.26931600 |
| H | 1.99678900  | -0.79189300 | -1.23634400 |
| O | 2.97596800  | 0.41870800  | 0.05120300  |

Electronic Energy + ZPE = -383.571415

### Products

#### 2CN

|   |             |             |             |
|---|-------------|-------------|-------------|
| C | -2.18629900 | 0.01684000  | 0.07020900  |
| H | -3.27121700 | 0.00831200  | 0.11136200  |
| C | -1.55586400 | -1.15315200 | -0.04677600 |

|   |             |             |             |
|---|-------------|-------------|-------------|
| H | -2.06159500 | -2.10949000 | -0.13142800 |
| C | -1.44610600 | 1.32865200  | 0.09758300  |
| H | -1.47610600 | 1.76866200  | 1.10333000  |
| H | -1.93792300 | 2.04797300  | -0.56699700 |
| O | -0.19834700 | -1.31023100 | -0.08320800 |
| C | 0.54328600  | -0.15813400 | 0.30040800  |
| C | 0.00048400  | 1.11267700  | -0.34934300 |
| H | 0.64857800  | 1.95107700  | -0.07881900 |
| H | 0.04480100  | 0.99148400  | -1.43859800 |
| H | 0.49059000  | -0.05617700 | 1.39686100  |
| C | 1.98492500  | -0.43168500 | -0.07270200 |
| H | 2.17929700  | -1.42809900 | -0.51801600 |
| O | 2.86597400  | 0.37711400  | 0.09896200  |

Electronic Energy + ZPE = -383.657884

#### 2CX

|   |             |             |             |
|---|-------------|-------------|-------------|
| C | 0.77096000  | 1.47267200  | -0.15707500 |
| H | 1.38020000  | 2.32447400  | 0.16546800  |
| H | 0.10452300  | 1.85187000  | -0.94289400 |
| C | 1.65892400  | 0.38223200  | -0.69431500 |
| H | 2.46825000  | 0.63349300  | -1.37322000 |
| C | 1.51733200  | -0.89743700 | -0.34145300 |
| H | 2.18091700  | -1.69130900 | -0.66881500 |
| O | 0.53656000  | -1.38432500 | 0.47974800  |
| C | -0.04639900 | 0.93914400  | 1.02169800  |
| H | 0.56926400  | 0.89900900  | 1.92651600  |
| H | -0.91411800 | 1.57207800  | 1.22715900  |
| C | -0.53257100 | -0.47615300 | 0.71920900  |
| H | -1.07578900 | -0.89050900 | 1.57703200  |
| C | -1.48577200 | -0.51661800 | -0.47002800 |
| H | -1.32683900 | -1.35942000 | -1.17418200 |

O -2.37171600 0.28898500 -0.63040800

Electronic Energy + ZPE = -383.657828

3TN

C 0.63127400 1.43728800 0.42568800

H 0.28746100 2.35886800 -0.06264800

H 1.07696500 1.74740700 1.37885800

C 1.64030700 0.73612600 -0.44494400

H 2.40576500 1.31219900 -0.95527500

C 1.60695400 -0.58455600 -0.64758700

H 2.28616400 -1.10399000 -1.31644800

O 0.72578300 -1.44774000 -0.07679800

C -0.05117600 -0.90733600 0.98851500

H 0.56685300 -0.88256900 1.89610800

H -0.88433800 -1.59775600 1.13010400

C -0.55396000 0.50286900 0.67299800

H -1.15184700 0.84073800 1.52983400

C -1.50538800 0.46409200 -0.51376800

H -1.28555000 1.16716400 -1.34563800

O -2.46447600 -0.26888100 -0.56574000

Electronic Energy + ZPE = -383.655441

3TX

C 0.23847400 1.37059900 0.10202300

H -0.03689600 2.19526300 -0.56585600

H -0.00373300 1.70489600 1.12203100

C 1.70864000 1.07471300 -0.02367500

H 2.41795900 1.89544600 -0.05784800

C 2.17496100 -0.16913600 -0.15048900

H 3.22138000 -0.40685100 -0.31259800

O 1.41159000 -1.29646300 -0.11163600

|   |             |             |             |
|---|-------------|-------------|-------------|
| C | 0.09373900  | -1.10698000 | 0.38308700  |
| H | -0.45050000 | -2.02352400 | 0.14557900  |
| H | 0.14307300  | -0.98949600 | 1.47658100  |
| C | -0.57802500 | 0.12093700  | -0.24829100 |
| H | -0.61662700 | -0.03268400 | -1.33241600 |
| C | -1.99792800 | 0.21106700  | 0.25621100  |
| H | -2.12423600 | 0.68056600  | 1.25780500  |
| O | -2.96028800 | -0.20738900 | -0.34417300 |

Electronic Energy + ZPE = -383.654216
